# Supplementary material for: Interpretable Speech Features vs. DNN Embeddings: What to Use in the Automatic Assessment of Parkinson’s Disease in Multi-lingual Scenarios
Source: bioRxiv or medRxiv preprint supplement (doi:10.1101/2023.05.29.23290697), 2023-06-03
Supplement: Supplementary file [file media-1.pdf]

# Supplementary Material

---

---

## 1. Supplementary Tables

| Interpretable Features |                                       |                                                                                                                                                                                                                                                                                                                                                                                                                                                                                                                                                                                                                                                                                                                                                                                                                                                                         |                   |
|------------------------|---------------------------------------|-------------------------------------------------------------------------------------------------------------------------------------------------------------------------------------------------------------------------------------------------------------------------------------------------------------------------------------------------------------------------------------------------------------------------------------------------------------------------------------------------------------------------------------------------------------------------------------------------------------------------------------------------------------------------------------------------------------------------------------------------------------------------------------------------------------------------------------------------------------------------|-------------------|
| Feature family         | Feature name                          | Feature description                                                                                                                                                                                                                                                                                                                                                                                                                                                                                                                                                                                                                                                                                                                                                                                                                                                     | Library           |
| Prosody                | Features based on F0                  | 1-6 F0-contour Avg., Std., Max., Min., Skew., Kurt<br>7-12 Tilt of a linear estimation of F0 for each voiced segment Avg., Std., Max., Min., Skew., Kurt.<br>13-18 MSE of a linear estimation of F0 for each voiced segment Avg., Std., Max., Min., Skew., Kurt.<br>19-24 F0 on the first voiced segment Avg., Std., Max., Min., Skew., Kurt.<br>25-30 F0 on the last voiced segment Avg., Std., Max., Min., Skew., Kurt.                                                                                                                                                                                                                                                                                                                                                                                                                                               | Disvoice          |
|                        | Features based on energy              | 31-34 energy-contour for voiced segments Avg., Std., Skew., Kurt.<br>35-38 Tilt of a linear estimation of energy contour for V segments Avg., Std., Skew., Kurt.<br>39-42 MSE of a linear estimation of energy contour for V segment Avg., Std., Skew., Kurt.<br>43-48 energy on the first voiced segment Avg., Std., Max., Min., Skew., Kurt.<br>49-54 energy on the last voiced segment Avg., Std., Max., Min., Skew., Kurt.<br>55-58 energy-contour for unvoiced segments Avg., Std., Skew., Kurt.<br>59-62 Tilt of a linear estimation of energy contour for U segments Avg., Std., Skew., Kurt.<br>63-66 MSE of a linear estimation of energy contour for U segments Avg., Std., Skew., Kurt.<br>67-72 energy on the first unvoiced segment Avg., Std., Max., Min., Skew., Kurt.<br>73-78 energy on the last unvoiced segment Avg., Std., Max., Min., Skew., Kurt. |                   |
|                        | Features based on duration            | 79 Voiced rate Number of voiced segments per second<br>80-85 Duration of Voiced Avg., Std., Max., Min., Skew., Kurt<br>86-91 Duration of Unvoiced Avg., Std., Max., Min., Skew., Kurt.<br>92-97 Duration of Pauses Avg., Std., Max., Min., Skew., Kurt.<br>98-103 Duration ratios Pause/(Voiced+Unvoiced), Pause/Unvoiced, Unvoiced/(Voiced+Unvoiced), Voiced/(Voiced+Unvoiced), Voiced/Pause, Unvoiced/Pause                                                                                                                                                                                                                                                                                                                                                                                                                                                           |                   |
|                        | Features based on loudness            | 104 Loudness variability                                                                                                                                                                                                                                                                                                                                                                                                                                                                                                                                                                                                                                                                                                                                                                                                                                                |                   |
|                        | Features based on pauses              | 105-107 Total Time<br>108-110 Total Speech Time<br>111-113 Total Pause Time<br>114-116 Percentage Pause Time<br>117-119 Speech Pause Time<br>120-122 Mean Pause Duration<br>123-125 Pause Variability                                                                                                                                                                                                                                                                                                                                                                                                                                                                                                                                                                                                                                                                   | DigiPsych Prosody |
| Linguistic             | Feature based on part-of-speech (POS) | 1-10 Word count, word count with no functional words, avg. word length, sentence count, avg. sentence length in words, noun count, verb count, numeral count, auxiliary count, adjective count,                                                                                                                                                                                                                                                                                                                                                                                                                                                                                                                                                                                                                                                                         | Whisper + Spacy   |
|                        | Features based on syntactic phrases   | 11-13 Number of noun phrases, number of verb phrases, number of prepositional phrases                                                                                                                                                                                                                                                                                                                                                                                                                                                                                                                                                                                                                                                                                                                                                                                   |                   |
| Cognitive              | Features based on speech rhythm       | 1-3 Feature based on speech rhythm Std., Skew., Kurt.                                                                                                                                                                                                                                                                                                                                                                                                                                                                                                                                                                                                                                                                                                                                                                                                                   | Whisper           |
|                        | Features based on IUs                 | 4 Number of correct informational verbs                                                                                                                                                                                                                                                                                                                                                                                                                                                                                                                                                                                                                                                                                                                                                                                                                                 | Whisper + Spacy   |

Table 1: Summary of the family of interpretable features extracted. For each feature family, we report the name of the features, with the number and description of the coefficients extracted and the library employed for the extraction. Abbreviations: Avg., Average; Std., Standard Deviation; Max, Maximum; Min, Minimum; Skew, Skewness; Kurt, Kurtosis.

|          |      | Mono-lingual  |      |             |      |      |             |      |               |      |      |             |      |             |         |      |             |      |             |      |             |             |      |             |             |             |             |             |
|----------|------|---------------|------|-------------|------|------|-------------|------|---------------|------|------|-------------|------|-------------|---------|------|-------------|------|-------------|------|-------------|-------------|------|-------------|-------------|-------------|-------------|-------------|
| Test     | Task | spk#          | SVM  |             |      | KNN  |             |      | Random Forest |      |      | XGBoost     |      |             | Bagging |      |             |      |             |      |             |             |      |             |             |             |             |             |
|          |      |               | ACC  | F1          | SPE  | SEN  | AUC         | ACC  | F1            | SPE  | SEN  | AUC         | ACC  | F1          | SPE     | SEN  | AUC         | ACC  | F1          | SPE  | SEN         | AUC         |      |             |             |             |             |             |
| NLS      | SS   | PD-23, HC-27  | 0.76 | <b>0.73</b> | 0.69 | 0.84 | <b>0.82</b> | 0.63 | 0.61          | 0.53 | 0.73 | 0.57        | 0.70 | 0.70        | 0.67    | 0.73 | 0.80        | 0.74 | <b>0.73</b> | 0.62 | 0.73        | 0.80        | 0.68 | 0.69        | 0.65        | 0.73        | 0.78        |             |
|          | RP   | PD-23, HC-27  | 0.66 | 0.62        | 0.58 | 0.65 | 0.60        | 0.70 | <b>0.70</b>   | 0.53 | 0.78 | <b>0.68</b> | 0.62 | 0.50        | 0.58    | 0.75 | 0.63        | 0.62 | 0.60        | 0.53 | 0.72        | 0.63        | 0.68 | 0.68        | 0.58        | 0.72        | 0.61        |             |
|          | TDU  | PD-43, HC-46  | 0.82 | 0.77        | 0.85 | 1.00 | 0.92        | 0.88 | <b>0.90</b>   | 0.96 | 0.96 | <b>0.95</b> | 0.82 | 0.80        | 0.96    | 0.94 | 0.93        | 0.86 | 0.86        | 0.86 | 0.94        | 0.93        | 0.88 | 0.86        | 0.96        | 0.94        | 0.94        |             |
|          | SS   | PD-20, HC-21  | 0.85 | <b>0.82</b> | 0.75 | 0.85 | 0.82        | 0.74 | 0.74          | 0.45 | 0.85 | <b>0.83</b> | 0.76 | 0.73        | 0.70    | 0.70 | 0.81        | 0.71 | 0.71        | 0.65 | 0.80        | 0.88        | 0.74 | 0.74        | 0.70        | 0.80        | 0.88        |             |
|          | SS   | PD-88, HC-88  | 0.57 | 0.70        | 1.00 | 0.08 | 0.57        | 0.73 | 0.73          | 0.77 | 0.63 | 0.75        | 0.69 | 0.70        | 0.73    | 0.68 | 0.71        | 0.73 | <b>0.73</b> | 0.76 | 0.66        | <b>0.77</b> | 0.73 | <b>0.73</b> | 0.76        | 0.66        | <b>0.77</b> |             |
| German   | RP   | PD-88, HC-88  | 0.69 | 0.70        | 0.74 | 0.62 | 0.79        | 0.73 | 0.73          | 0.80 | 0.61 | 0.75        | 0.73 | 0.73        | 0.72    | 0.73 | 0.79        | 0.71 | 0.71        | 0.69 | 0.71        | 0.77        | 0.73 | 0.73        | 0.73        | 0.71        | 0.79        |             |
|          | TDU  | PD-88, HC-88  | 0.73 | 0.72        | 0.68 | 0.74 | 0.81        | 0.75 | 0.75          | 0.80 | 0.66 | 0.82        | 0.76 | 0.75        | 0.73    | 0.78 | 0.83        | 0.74 | 0.74        | 0.79 | 0.73        | 0.82        | 0.76 | <b>0.76</b> | 0.73        | 0.73        | <b>0.84</b> |             |
|          | SS   | PD-20, HC-15  | 0.73 | 0.71        | 0.70 | 0.90 | 0.76        | 0.76 | 0.73          | 0.75 | 0.90 | <b>0.79</b> | 0.77 | 0.78        | 0.80    | 0.80 | 0.78        | 0.79 | 0.79        | 0.75 | 0.75        | 0.70        | 0.80 | <b>0.80</b> | 0.80        | 0.85        | 0.78        |             |
| CzechPD  | RP   | PD-20, HC-15  | 0.80 | <b>0.77</b> | 0.75 | 0.70 | 0.80        | 0.78 | 0.71          | 0.75 | 0.90 | 0.90        | 0.71 | 0.71        | 0.70    | 0.65 | 0.85        | 0.71 | 0.71        | 0.70 | 0.70        | <b>0.85</b> | 0.73 | 0.72        | 0.75        | 0.70        | 0.85        |             |
|          | SS   | PD-49, HC-50  | 0.51 | 0.50        | 0.40 | 0.60 | 0.50        | 0.54 | 0.65          | 0.64 | 0.57 | 0.55        | 0.51 | 0.55        | 0.52    | 0.57 | 0.56        | 0.55 | 0.55        | 0.53 | 0.56        | 0.57        | 0.56 | <b>0.56</b> | 0.55        | 0.56        | <b>0.60</b> |             |
|          | RP   | PD-49, HC-50  | 0.67 | 0.63        | 0.68 | 0.78 | 0.72        | 0.68 | 0.58          | 0.51 | 0.80 | <b>0.73</b> | 0.63 | 0.62        | 0.63    | 0.62 | 0.69        | 0.70 | <b>0.70</b> | 0.63 | 0.66        | 0.71        | 0.62 | 0.62        | 0.61        | 0.66        | 0.72        |             |
| GITA     | TDU  | PD-50, HC-50  | 0.63 | 0.62        | 0.62 | 0.64 | 0.68        | 0.60 | 0.60          | 0.46 | 0.86 | 0.72        | 0.69 | 0.67        | 0.76    | 0.66 | 0.75        | 0.69 | 0.69        | 0.80 | 0.68        | <b>0.77</b> | 0.72 | <b>0.72</b> | 0.78        | 0.68        | 0.74        |             |
|          | RP   | PD-24, HC-36  | 0.93 | 0.91        | 0.88 | 0.98 | 0.98        | 0.90 | 0.90          | 0.85 | 0.94 | 0.90        | 0.95 | <b>0.93</b> | 0.92    | 0.98 | 0.95        | 0.92 | 0.92        | 0.87 | <b>0.98</b> | 0.90        | 0.90 | 0.88        | 0.92        | 0.95        |             |             |
|          | TDU  | PD-22, HC-21  | 0.88 | 0.90        | 0.79 | 0.95 | 0.92        | 0.87 | 0.87          | 0.82 | 0.90 | 0.93        | 0.88 | 0.88        | 0.88    | 0.90 | 0.98        | 0.98 | <b>0.98</b> | 0.97 | 1.00        | <b>1.00</b> | 0.92 | 0.92        | 0.92        | 0.86        | 1.00        | 0.98        |
|          |      | Multi-lingual |      |             |      |      |             |      |               |      |      |             |      |             |         |      |             |      |             |      |             |             |      |             |             |             |             |             |
| Test     | Task | spk#          | SVM  |             |      | KNN  |             |      | Random Forest |      |      | XGBoost     |      |             | Bagging |      |             |      |             |      |             |             |      |             |             |             |             |             |
|          |      |               | ACC  | F1          | SPE  | SEN  | AUC         | ACC  | F1            | SPE  | SEN  | AUC         | ACC  | F1          | SPE     | SEN  | AUC         | ACC  | F1          | SPE  | SEN         | AUC         |      |             |             |             |             |             |
| NLS      | SS   | PD-23, HC-27  | 0.80 | <b>0.82</b> | 0.79 | 0.71 | <b>0.83</b> | 0.73 | 0.71          | 0.70 | 0.85 | 0.80        | 0.64 | 0.67        | 0.72    | 0.57 | 0.77        | 0.68 | 0.70        | 0.62 | 0.69        | 0.77        | 0.68 | 0.70        | 0.71        | 0.57        | 0.76        |             |
|          | RP   | PD-23, HC-27  | 0.66 | 0.65        | 0.75 | 0.57 | 0.78        | 0.60 | 0.60          | 0.57 | 0.87 | 0.72        | 0.70 | <b>0.68</b> | 0.67    | 0.68 | <b>0.78</b> | 0.72 | <b>0.72</b> | 0.78 | 0.77        | 0.77        | 0.70 | 0.70        | 0.75        | 0.77        | <b>0.82</b> |             |
|          | TDU  | PD-43, HC-46  | 0.84 | <b>0.86</b> | 0.93 | 0.77 | <b>0.90</b> | 0.81 | 0.81          | 0.60 | 0.92 | 0.86        | 0.81 | 0.83        | 0.90    | 0.70 | 0.90        | 0.80 | 0.80        | 0.86 | 0.74        | 0.80        | 0.81 | 0.82        | 0.88        | 0.72        | 0.89        |             |
|          | SS   | PD-20, HC-21  | 0.76 | 0.78        | 0.80 | 0.62 | <b>0.92</b> | 0.68 | 0.68          | 0.70 | 0.72 | 0.82        | 0.84 | <b>0.85</b> | 0.95    | 0.72 | 0.88        | 0.74 | 0.74        | 0.80 | 0.62        | 0.86        | 0.74 | 0.74        | 0.85        | 0.62        | 0.91        |             |
|          | SS   | PD-88, HC-88  | 0.71 | 0.69        | 0.65 | 0.72 | 0.75        | 0.66 | 0.66          | 0.53 | 0.76 | 0.71        | 0.68 | 0.68        | 0.67    | 0.68 | 0.74        | 0.71 | <b>0.71</b> | 0.71 | 0.69        | <b>0.75</b> | 0.70 | 0.70        | 0.67        | 0.69        | 0.74        |             |
| GermanPD | RP   | PD-88, HC-88  | 0.69 | 0.67        | 0.67 | 0.78 | 0.79        | 0.66 | 0.66          | 0.66 | 0.76 | 0.71        | 0.73 | 0.71        | 0.72    | 0.77 | 0.81        | 0.76 | <b>0.76</b> | 0.70 | 0.71        | <b>0.83</b> | 0.73 | 0.73        | 0.71        | 0.71        | 0.81        |             |
|          | TDU  | PD-88, HC-88  | 0.73 | 0.71        | 0.70 | 0.75 | 0.76        | 0.73 | 0.73          | 0.64 | 0.79 | 0.79        | 0.76 | 0.74        | 0.72    | 0.81 | 0.81        | 0.73 | 0.73        | 0.66 | 0.76        | 0.80        | 0.76 | <b>0.76</b> | 0.67        | 0.76        | <b>0.80</b> |             |
|          | SS   | PD-20, HC-15  | 0.72 | 0.78        | 0.85 | 0.45 | 0.72        | 0.68 | 0.68          | 0.75 | 0.65 | 0.80        | 0.76 | 0.79        | 0.85    | 0.50 | 0.72        | 0.82 | <b>0.82</b> | 0.90 | 0.50        | 0.65        | 0.76 | 0.76        | 0.80        | 0.50        | <b>0.85</b> |             |
| CzechPD  | RP   | PD-20, HC-15  | 0.78 | <b>0.82</b> | 0.85 | 0.50 | 0.72        | 0.62 | 0.72          | 0.55 | 0.75 | 0.75        | 0.67 | 0.69        | 0.75    | 0.55 | <b>0.80</b> | 0.72 | 0.80        | 0.55 | 0.80        | 0.67        | 0.67 | 0.67        | 0.75        | 0.55        | 0.72        |             |
|          | SS   | PD-49, HC-50  | 0.52 | 0.51        | 0.44 | 0.60 | 0.56        | 0.57 | 0.37          | 0.43 | 0.72 | 0.61        | 0.38 | 0.53        | 0.48    | 0.66 | 0.60        | 0.60 | <b>0.60</b> | 0.52 | 0.38        | <b>0.62</b> | 0.59 | 0.59        | 0.48        | 0.58        | 0.62        |             |
|          | RP   | PD-49, HC-50  | 0.58 | 0.53        | 0.61 | 0.68 | 0.69        | 0.62 | 0.62          | 0.40 | 0.84 | 0.71        | 0.66 | 0.63        | 0.63    | 0.66 | <b>0.75</b> | 0.66 | 0.66        | 0.59 | 0.68        | 0.74        | 0.67 | <b>0.67</b> | 0.61        | 0.68        | 0.71        |             |
| GITA     | TDU  | PD-50, HC-50  | 0.66 | 0.62        | 0.54 | 0.70 | 0.73        | 0.60 | 0.60          | 0.36 | 0.88 | 0.71        | 0.68 | 0.66        | 0.66    | 0.72 | 0.74        | 0.69 | 0.69        | 0.66 | 0.62        | 0.74        | 0.77 | 0.71        | <b>0.71</b> | 0.66        | 0.74        | <b>0.78</b> |
|          | RP   | PD-24, HC-36  | 0.85 | <b>0.86</b> | 0.87 | 0.79 | <b>0.93</b> | 0.72 | 0.72          | 0.57 | 0.84 | 0.85        | 0.77 | 0.74        | 0.80    | 0.76 | 0.86        | 0.85 | 0.85        | 0.80 | 0.79        | 0.88        | 0.82 | 0.82        | 0.80        | 0.79        | 0.88        |             |
|          | TDU  | PD-22, HC-21  | 0.84 | <b>0.87</b> | 0.90 | 0.75 | 0.86        | 0.71 | 0.71          | 0.39 | 0.87 | 0.80        | 0.81 | 0.85        | 0.88    | 0.67 | 0.80        | 0.86 | 0.86        | 0.86 | 0.88        | <b>0.87</b> | 0.79 | 0.79        | 0.93        | 0.67        | 0.76        |             |
|          |      | Cross-lingual |      |             |      |      |             |      |               |      |      |             |      |             |         |      |             |      |             |      |             |             |      |             |             |             |             |             |
| Test     | Task | spk#          | SVM  |             |      | KNN  |             |      | Random Forest |      |      | XGBoost     |      |             | Bagging |      |             |      |             |      |             |             |      |             |             |             |             |             |
|          |      |               | ACC  | F1          | SPE  | SEN  | AUC         | ACC  | F1            | SPE  | SEN  | AUC         | ACC  | F1          | SPE     | SEN  | AUC         | ACC  | F1          | SPE  | SEN         | AUC         |      |             |             |             |             |             |
| NLS      | SS   | PD-23, HC-27  | 0.67 | 0.68        | 0.73 | 0.61 | 0.70        | 0.65 | 0.65          | 0.38 | 0.89 | 0.71        | 0.76 | 0.70        | 0.58    | 0.93 | 0.74        | 0.72 | 0.72        | 0.65 | 0.79        | 0.75        | 0.76 | <b>0.76</b> | 0.65        | 0.79        | <b>0.76</b> |             |
|          | RP   | PD-23, HC-27  | 0.56 | <b>0.67</b> | 0.96 | 0.22 | 0.69        | 0.54 | 0.54          | 0.83 | 0.30 | 0.62        | 0.66 | 0.71        | 0.91    | 0.44 | <b>0.79</b> | 0.72 | <b>0.72</b> | 0.87 | 0.59        | <b>0.79</b> | 0.64 | 0.64        | 0.87        | 0.59        | 0.79        |             |
|          | TDU  | PD-43, HC-46  | 0.66 | <b>0.72</b> | 0.86 | 0.43 | 0.72        | 0.70 | 0.70          | 0.84 | 0.72 | <b>0.76</b> | 0.57 | 0.69        | 0.96    | 0.04 | 0.71        | 0.60 | 0.69        | 0.94 | 0.39        | 0.71        | 0.56 | 0.56        | 0.95        | 0.39        | 0.67        |             |
|          | SS   | PD-20, HC-21  | 0.51 | 0.60        | 0.75 | 0.29 | 0.78        | 0.59 | 0.59          | 0.70 | 0.48 | 0.66        | 0.68 | <b>0.73</b> | 0.90    | 0.48 | <b>0.85</b> | 0.68 | 0.68        | 0.90 | 0.48        | 0.79        | 0.68 | 0.68        | 0.90        | 0.48        | 0.81        |             |
|          | SS   | PD-88, HC-88  | 0.45 | 0.21        | 0.15 | 0.75 | 0.52        | 0.48 | 0.48          | 0.03 | 0.93 | 0.55        | 0.51 | 0.25        | 0.16    | 0.86 | 0.58        | 0.52 | 0.52        | 0.16 | 0.89        | 0.60        | 0.52 | <b>0.52</b> | 0.12        | 0.89        | <b>0.60</b> |             |
| GermanPD | RP   | PD-88, HC-88  | 0.48 | 0.26        | 0.70 | 0.78 | 0.52        | 0.52 | 0.52          | 0.67 | 0.99 | 0.54        | 0.48 | 0.22        | 0.65    | 0.82 | 0.51        | 0.53 | <b>0.53</b> | 0.65 | 0.82        | <b>0.60</b> | 0.51 | 0.51        | 0.68        | 0.82        | 0.52        |             |
|          | TDU  | PD-88, HC-88  | 0.53 | 0.66        | 0.92 | 0.11 | 0.52        | 0.52 | 0.52          | 0.30 | 0.82 | 0.63        | 0.57 | <b>0.66</b> | 0.83    | 0.38 | 0.63        | 0.58 | 0.58        | 0.77 | 0.38        | 0.62        | 0.56 | 0.67        | 0.38        | <b>0.64</b> |             |             |
|          | SS   | PD-20, HC-15  | 0.60 | <b>0.67</b> | 0.70 | 0.86 | 0.68        | 0.43 | 0.43          | 0.20 | 0.81 | 0.64        | 0.43 | 0.50        | 0.40    | 0.82 | 0.68        | 0.49 | 0.49        | 0.10 | 0.77        | 0.69        | 0.43 | 0.43        | 0.20        | <b>0.77</b> | <b>0.73</b> |             |
| CzechPD  | RP   | PD-20, HC-15  | 0.54 | 0.54        | 0.54 | 0.54 | 0.69        | 0.46 | 0.46          | 0.20 | 0.80 | 0.57        | 0.60 | 0.46        | 0.30    | 1.00 | 0.76        | 0.70 | <b>0.70</b> | 0.45 | 1.00        | <b>0.79</b> | 0.63 | 0.63        | 0.35        | 1.00        | 0.79        |             |
|          | SS   | PD-49, HC-50  | 0.56 | <b>0.56</b> | 0.56 | 0.56 | 0.56        | 0.56 | 0.56          | 0.80 | 0.32 | 0.52        | 0.52 | <b>0.64</b> | 0.86    | 0.18 | <b>0.59</b> | 0.51 | 0.51        | 0.90 | 0.20        | 0.55        | 0.53 | 0.53        | 0.86        | 0.20        | 0.58        |             |
|          | RP   | PD-49, HC-50  | 0.48 | 0.65        | 1.00 | 0.00 | 0.42        | 0.49 | 0.49          | 0.94 | 0.04 | 0.45        | 0.49 | <b>0.66</b> | 0.98    | 0.02 | 0.43        | 0.51 | 0.51        | 1.00 | 0.04        | 0.50        | 0.52 | 0.52        | 0.98        | 0.04        | <b>0.55</b> |             |
| GITA     | TDU  | PD-50, HC-50  | 0.53 | <b>0.65</b> | 0.67 | 0.20 | 0.64        | 0.63 | 0.63          | 0.52 | 0.52 | 0.65        | 0.53 | 0.32        | 0.98    | 0.42 |             |      |             |      |             |             |      |             |             |             |             |             |

Table 3: Results for mono-lingual, multi-lingual, and cross-lingual experiments using x-vectors and TRILLsson features respectively. Results are reported for SS, RP and TDU tasks respectively. Accuracy (ACC), F1-score, sensitivity (SEN), specificity (SPE), and area under the ROC (AUC) are reported. The best F1 and AUC across each row are emphasized in bold. For multi-lingual and cross-lingual experiments, shaded F1 and AUC represent an improvement  $\geq 5\%$  with respect to mono-lingual experiments.

| Mono-lingual  |      |              |          |             |      |      |             |           |             |      |      |             |
|---------------|------|--------------|----------|-------------|------|------|-------------|-----------|-------------|------|------|-------------|
| Test          | Task | spk#         | x-vector |             |      |      |             | TRILLsson |             |      |      |             |
|               |      |              | ACC      | F1          | SPE  | SEN  | AUC         | ACC       | F1          | SPE  | SEN  | AUC         |
| NLS           | SS   | PD-23, HC-27 | 0.65     | 0.65        | 0.55 | 0.77 | 0.74        | 0.78      | <b>0.78</b> | 0.76 | 0.81 | <b>0.82</b> |
|               | RP   | PD-23, HC-27 | 0.63     | 0.63        | 0.57 | 0.70 | 0.64        | 0.67      | <b>0.66</b> | 0.54 | 0.83 | <b>0.73</b> |
| Neurovoz      | TDU  | PD-43, HC-46 | 0.82     | 0.82        | 0.83 | 0.81 | 0.92        | 0.90      | <b>0.90</b> | 0.87 | 0.93 | <b>0.95</b> |
|               | SS   | PD-20, HC-21 | 0.76     | <b>0.75</b> | 0.86 | 0.65 | <b>0.75</b> | 0.73      | 0.73        | 0.71 | 0.75 | 0.74        |
| GermanPD      | SS   | PD-88, HC-88 | 0.74     | 0.74        | 0.76 | 0.73 | 0.81        | 0.80      | <b>0.80</b> | 0.78 | 0.81 | <b>0.84</b> |
|               | RP   | PD-88, HC-88 | 0.70     | 0.70        | 0.72 | 0.69 | 0.78        | 0.79      | <b>0.79</b> | 0.83 | 0.75 | <b>0.83</b> |
|               | TDU  | PD-88, HC-88 | 0.68     | 0.68        | 0.69 | 0.66 | 0.73        | 0.78      | <b>0.78</b> | 0.76 | 0.81 | <b>0.84</b> |
| CzechPD       | SS   | PD-20, HC-15 | 0.83     | <b>0.83</b> | 0.87 | 0.80 | 0.86        | 0.80      | 0.80        | 0.93 | 0.70 | <b>0.92</b> |
|               | RP   | PD-20, HC-15 | 0.77     | <b>0.77</b> | 0.80 | 0.75 | 0.83        | 0.77      | <b>0.77</b> | 0.87 | 0.70 | <b>0.85</b> |
| GITA          | SS   | PD-49, HC-50 | 0.76     | <b>0.76</b> | 0.76 | 0.76 | 0.83        | 0.76      | <b>0.76</b> | 0.78 | 0.73 | <b>0.84</b> |
|               | RP   | PD-49, HC-50 | 0.76     | 0.76        | 0.82 | 0.69 | 0.84        | 0.84      | <b>0.84</b> | 0.84 | 0.84 | <b>0.87</b> |
|               | TDU  | PD-50, HC-50 | 0.74     | 0.74        | 0.80 | 0.68 | 0.86        | 0.78      | <b>0.78</b> | 0.78 | 0.78 | <b>0.87</b> |
| ItalianPVS    | RP   | PD-24, HC-36 | 0.83     | 0.83        | 0.75 | 0.96 | <b>0.98</b> | 0.85      | <b>0.85</b> | 0.78 | 0.96 | 0.95        |
|               | TDU  | PD-22, HC-21 | 0.85     | 0.85        | 1.00 | 0.73 | <b>1.00</b> | 0.89      | <b>0.89</b> | 1.00 | 0.81 | 0.99        |
| Multi-lingual |      |              |          |             |      |      |             |           |             |      |      |             |
| Test          | Task | spk#         | x-vector |             |      |      |             | TRILLsson |             |      |      |             |
|               |      |              | ACC      | F1          | SPE  | SEN  | AUC         | ACC       | F1          | SPE  | SEN  | AUC         |
| NLS           | SS   | PD-23, HC-27 | 0.78     | 0.78        | 0.76 | 0.81 | 0.84        | 0.85      | <b>0.85</b> | 0.79 | 0.92 | <b>0.92</b> |
|               | RP   | PD-23, HC-27 | 0.65     | 0.64        | 0.68 | 0.61 | 0.68        | 0.67      | <b>0.67</b> | 0.64 | 0.70 | <b>0.77</b> |
| Neurovoz      | TDU  | PD-43, HC-46 | 0.84     | <b>0.84</b> | 0.87 | 0.81 | 0.89        | 0.84      | <b>0.84</b> | 0.83 | 0.86 | <b>0.93</b> |
|               | SS   | PD-20, HC-21 | 0.71     | 0.70        | 0.81 | 0.60 | 0.80        | 0.76      | <b>0.75</b> | 0.86 | 0.65 | <b>0.89</b> |
| GermanPD      | SS   | PD-88, HC-88 | 0.76     | 0.76        | 0.77 | 0.75 | 0.81        | 0.77      | <b>0.77</b> | 0.81 | 0.74 | <b>0.84</b> |
|               | RP   | PD-88, HC-88 | 0.70     | 0.70        | 0.64 | 0.76 | 0.79        | 0.85      | <b>0.85</b> | 0.80 | 0.91 | <b>0.88</b> |
|               | TDU  | PD-88, HC-88 | 0.74     | 0.74        | 0.78 | 0.70 | 0.79        | 0.79      | <b>0.79</b> | 0.80 | 0.78 | <b>0.84</b> |
| CzechPD       | SS   | PD-20, HC-15 | 0.71     | 0.71        | 0.67 | 0.75 | 0.84        | 0.89      | <b>0.88</b> | 0.80 | 0.95 | <b>0.93</b> |
|               | RP   | PD-20, HC-15 | 0.69     | 0.68        | 0.60 | 0.75 | 0.81        | 0.91      | <b>0.91</b> | 0.87 | 0.95 | <b>0.90</b> |
| GITA          | SS   | PD-49, HC-50 | 0.76     | 0.76        | 0.80 | 0.71 | 0.80        | 0.81      | <b>0.81</b> | 0.80 | 0.82 | <b>0.91</b> |
|               | RP   | PD-49, HC-50 | 0.72     | 0.72        | 0.80 | 0.63 | 0.78        | 0.80      | <b>0.80</b> | 0.80 | 0.80 | <b>0.88</b> |
|               | TDU  | PD-50, HC-50 | 0.74     | 0.74        | 0.78 | 0.70 | 0.82        | 0.78      | <b>0.78</b> | 0.80 | 0.76 | <b>0.86</b> |
| ItalianPVS    | RP   | PD-24, HC-36 | 0.90     | <b>0.90</b> | 0.89 | 0.92 | <b>0.97</b> | 0.90      | <b>0.90</b> | 0.89 | 0.92 | <b>0.97</b> |
|               | TDU  | PD-22, HC-21 | 0.81     | 0.80        | 0.67 | 0.92 | 0.94        | 0.91      | <b>0.91</b> | 0.86 | 0.96 | <b>0.97</b> |
| Cross-lingual |      |              |          |             |      |      |             |           |             |      |      |             |
| Test          | Task | spk#         | x-vector |             |      |      |             | TRILLsson |             |      |      |             |
|               |      |              | ACC      | F1          | SPE  | SEN  | AUC         | ACC       | F1          | SPE  | SEN  | AUC         |
| NLS           | SS   | PD-23, HC-27 | 0.69     | <b>0.68</b> | 0.52 | 0.88 | 0.77        | 0.58      | 0.53        | 0.24 | 0.96 | <b>0.89</b> |
|               | RP   | PD-23, HC-27 | 0.55     | <b>0.54</b> | 0.39 | 0.74 | 0.66        | 0.43      | 0.30        | 0.00 | 0.96 | <b>0.76</b> |
| Neurovoz      | TDU  | PD-43, HC-46 | 0.62     | 0.60        | 0.37 | 0.89 | 0.78        | 0.72      | <b>0.69</b> | 0.98 | 0.44 | <b>0.88</b> |
|               | SS   | PD-20, HC-21 | 0.71     | <b>0.71</b> | 0.67 | 0.75 | 0.77        | 0.68      | 0.65        | 0.95 | 0.40 | <b>0.90</b> |
| GermanPD      | SS   | PD-88, HC-88 | 0.68     | 0.68        | 0.70 | 0.65 | 0.74        | 0.75      | <b>0.74</b> | 0.60 | 0.90 | <b>0.84</b> |
|               | RP   | PD-88, HC-88 | 0.62     | <b>0.60</b> | 0.40 | 0.84 | 0.70        | 0.61      | 0.57        | 0.93 | 0.30 | <b>0.81</b> |
|               | TDU  | PD-88, HC-88 | 0.53     | <b>0.41</b> | 0.08 | 0.99 | 0.72        | 0.52      | 0.38        | 0.05 | 1.00 | <b>0.79</b> |
| CzechPD       | SS   | PD-20, HC-15 | 0.66     | 0.65        | 0.87 | 0.50 | 0.76        | 0.89      | <b>0.89</b> | 1.00 | 0.80 | <b>0.97</b> |
|               | RP   | PD-20, HC-15 | 0.63     | 0.62        | 0.93 | 0.40 | 0.74        | 0.74      | <b>0.74</b> | 0.93 | 0.60 | <b>0.90</b> |
| GITA          | SS   | PD-49, HC-50 | 0.56     | 0.55        | 0.46 | 0.65 | 0.66        | 0.82      | <b>0.82</b> | 0.92 | 0.71 | <b>0.89</b> |
|               | RP   | PD-49, HC-50 | 0.63     | <b>0.61</b> | 0.42 | 0.84 | 0.77        | 0.61      | 0.55        | 0.24 | 0.98 | <b>0.80</b> |
|               | TDU  | PD-50, HC-50 | 0.62     | 0.62        | 0.56 | 0.68 | 0.70        | 0.70      | <b>0.69</b> | 0.50 | 0.90 | <b>0.82</b> |
| ItalianPVS    | RP   | PD-24, HC-36 | 0.80     | <b>0.79</b> | 0.86 | 0.71 | 0.88        | 0.75      | 0.69        | 1.00 | 0.38 | <b>0.94</b> |
|               | TDU  | PD-22, HC-21 | 0.64     | 0.64        | 0.67 | 0.62 | 0.68        | 0.66      | <b>0.66</b> | 0.86 | 0.50 | <b>0.83</b> |

Table 4: Results for mono-lingual, multi-lingual, and cross-lingual experiments using Wav2Vec 2.0. and HuBERT features, respectively. Results are reported for SS, RP, and TDU tasks respectively. Accuracy (ACC), F-1 score, sensitivity (SEN), specificity (SPE), and area under the ROC (AUC) are reported. The best F1 and AUC across each row are emphasized in bold. For multi-lingual and cross-lingual experiments, shaded F1 and AUC represent an improvement  $\geq 5\%$  with respect to mono-lingual experiments. For Wav2Vec 2.0., we report results obtained using layer 4, and for Hubert, those obtained using layer 7. We did so as we achieved the highest performances using representations extracted from these layers.

| Mono-lingual  |      |              |              |             |      |      |             |        |             |      |      |             |
|---------------|------|--------------|--------------|-------------|------|------|-------------|--------|-------------|------|------|-------------|
| Test          | Task | spk#         | Wav2Vec 2.0. |             |      |      |             | HuBERT |             |      |      |             |
|               |      |              | ACC          | F1          | SPE  | SEN  | AUC         | ACC    | F1          | SPE  | SEN  | AUC         |
| NLS           | SS   | PD-23, HC-27 | 0.78         | <b>0.78</b> | 0.83 | 0.73 | <b>0.77</b> | 0.67   | 0.62        | 0.76 | 0.58 | 0.70        |
|               | RP   | PD-23, HC-27 | 0.63         | <b>0.63</b> | 0.64 | 0.61 | 0.60        | 0.63   | 0.60        | 0.64 | 0.61 | <b>0.62</b> |
| Neurovoz      | TDU  | PD-43, HC-46 | 0.91         | <b>0.91</b> | 0.89 | 0.93 | <b>0.96</b> | 0.90   | 0.90        | 0.89 | 0.91 | <b>0.96</b> |
|               | SS   | PD-20, HC-21 | 0.66         | 0.66        | 0.62 | 0.70 | 0.67        | 0.73   | <b>0.74</b> | 0.67 | 0.80 | <b>0.78</b> |
| GermanPD      | SS   | PD-88, HC-88 | 0.76         | 0.76        | 0.77 | 0.74 | 0.85        | 0.78   | <b>0.78</b> | 0.81 | 0.76 | <b>0.86</b> |
|               | RP   | PD-88, HC-88 | 0.78         | <b>0.78</b> | 0.78 | 0.78 | 0.83        | 0.78   | 0.77        | 0.83 | 0.74 | <b>0.88</b> |
|               | TDU  | PD-88, HC-88 | 0.75         | 0.75        | 0.75 | 0.75 | 0.79        | 0.79   | <b>0.78</b> | 0.85 | 0.72 | <b>0.88</b> |
| CzechPD       | SS   | PD-20, HC-15 | 0.86         | <b>0.86</b> | 0.93 | 0.80 | 0.88        | 0.80   | 0.81        | 0.87 | 0.75 | <b>0.91</b> |
|               | RP   | PD-20, HC-15 | 0.83         | 0.83        | 0.87 | 0.80 | <b>0.89</b> | 0.83   | <b>0.84</b> | 0.87 | 0.80 | 0.83        |
| GITA          | SS   | PD-49, HC-50 | 0.86         | <b>0.86</b> | 0.90 | 0.82 | <b>0.90</b> | 0.83   | 0.82        | 0.86 | 0.79 | 0.89        |
|               | RP   | PD-49, HC-50 | 0.76         | <b>0.76</b> | 0.76 | 0.76 | <b>0.86</b> | 0.75   | 0.74        | 0.76 | 0.74 | 0.79        |
|               | TDU  | PD-50, HC-50 | 0.82         | <b>0.82</b> | 0.82 | 0.82 | <b>0.89</b> | 0.79   | 0.78        | 0.82 | 0.76 | 0.85        |
| ItalianPVS    | RP   | PD-24, HC-36 | 0.83         | 0.83        | 0.75 | 0.96 | 0.96        | 0.85   | <b>0.84</b> | 0.78 | 0.96 | <b>0.97</b> |
|               | TDU  | PD-22, HC-21 | 0.87         | <b>0.87</b> | 1.00 | 0.77 | <b>1.00</b> | 0.85   | 0.84        | 1.00 | 0.73 | <b>1.00</b> |
| Multi-lingual |      |              |              |             |      |      |             |        |             |      |      |             |
| Test          | Task | spk#         | Wav2Vec 2.0. |             |      |      |             | HuBERT |             |      |      |             |
|               |      |              | ACC          | F1          | SPE  | SEN  | AUC         | ACC    | F1          | SPE  | SEN  | AUC         |
| NLS           | SS   | PD-23, HC-27 | 0.80         | <b>0.80</b> | 0.79 | 0.81 | <b>0.80</b> | 0.65   | 0.64        | 0.66 | 0.65 | 0.72        |
|               | RP   | PD-23, HC-27 | 0.76         | <b>0.76</b> | 0.86 | 0.65 | <b>0.72</b> | 0.67   | 0.62        | 0.71 | 0.60 | <b>0.71</b> |
| Neurovoz      | TDU  | PD-43, HC-46 | 0.91         | <b>0.91</b> | 0.89 | 0.93 | <b>0.96</b> | 0.84   | 0.84        | 0.83 | 0.86 | 0.93        |
|               | SS   | PD-20, HC-21 | 0.76         | <b>0.75</b> | 0.86 | 0.65 | <b>0.84</b> | 0.78   | <b>0.77</b> | 0.81 | 0.75 | <b>0.83</b> |
| GermanPD      | SS   | PD-88, HC-88 | 0.82         | <b>0.82</b> | 0.75 | 0.89 | <b>0.86</b> | 0.77   | 0.77        | 0.79 | 0.75 | <b>0.86</b> |
|               | RP   | PD-88, HC-88 | 0.77         | 0.77        | 0.73 | 0.82 | <b>0.86</b> | 0.80   | <b>0.79</b> | 0.81 | 0.78 | 0.85        |
|               | TDU  | PD-88, HC-88 | 0.76         | 0.76        | 0.76 | 0.75 | <b>0.82</b> | 0.80   | <b>0.80</b> | 0.81 | 0.80 | 0.79        |
| CzechPD       | SS   | PD-20, HC-15 | 0.83         | 0.83        | 0.80 | 0.85 | <b>0.92</b> | 0.83   | <b>0.86</b> | 0.73 | 0.90 | 0.87        |
|               | RP   | PD-20, HC-15 | 0.83         | 0.82        | 0.73 | 0.90 | <b>0.93</b> | 0.86   | <b>0.87</b> | 0.87 | 0.85 | <b>0.92</b> |
| GITA          | SS   | PD-49, HC-50 | 0.76         | 0.76        | 0.78 | 0.73 | <b>0.85</b> | 0.79   | <b>0.77</b> | 0.84 | 0.73 | 0.83        |
|               | RP   | PD-49, HC-50 | 0.82         | <b>0.82</b> | 0.84 | 0.80 | <b>0.88</b> | 0.73   | 0.73        | 0.72 | 0.73 | 0.81        |
|               | TDU  | PD-50, HC-50 | 0.75         | 0.75        | 0.82 | 0.68 | <b>0.86</b> | 0.79   | <b>0.78</b> | 0.84 | 0.74 | 0.85        |
| ItalianPVS    | RP   | PD-24, HC-36 | 0.90         | <b>0.90</b> | 0.86 | 0.96 | <b>0.98</b> | 0.93   | <b>0.92</b> | 0.92 | 0.96 | <b>0.98</b> |
|               | TDU  | PD-22, HC-21 | 0.91         | 0.91        | 0.81 | 1.00 | <b>0.99</b> | 0.94   | <b>0.95</b> | 0.86 | 1.00 | <b>0.99</b> |
| Cross-lingual |      |              |              |             |      |      |             |        |             |      |      |             |
| Test          | Task | spk#         | Wav2Vec 2.0. |             |      |      |             | HuBERT |             |      |      |             |
|               |      |              | ACC          | F1          | SPE  | SEN  | AUC         | ACC    | F1          | SPE  | SEN  | AUC         |
| NLS           | SS   | PD-23, HC-27 | 0.73         | <b>0.72</b> | 0.83 | 0.62 | <b>0.76</b> | 0.65   | <b>0.71</b> | 0.45 | 0.88 | 0.70        |
|               | RP   | PD-23, HC-27 | 0.63         | 0.61        | 0.75 | 0.48 | <b>0.67</b> | 0.67   | <b>0.64</b> | 0.68 | 0.65 | <b>0.74</b> |
| Neurovoz      | TDU  | PD-43, HC-46 | 0.73         | 0.72        | 0.57 | 0.91 | <b>0.89</b> | 0.78   | <b>0.77</b> | 0.76 | 0.79 | 0.87        |
|               | SS   | PD-20, HC-21 | 0.63         | 0.60        | 0.33 | 0.95 | <b>0.78</b> | 0.71   | <b>0.62</b> | 0.90 | 0.50 | <b>0.81</b> |
| GermanPD      | SS   | PD-88, HC-88 | 0.72         | <b>0.71</b> | 0.81 | 0.63 | 0.78        | 0.68   | 0.61        | 0.86 | 0.50 | <b>0.79</b> |
|               | RP   | PD-88, HC-88 | 0.65         | 0.62        | 0.36 | 0.94 | <b>0.78</b> | 0.69   | <b>0.67</b> | 0.74 | 0.64 | 0.75        |
|               | TDU  | PD-88, HC-88 | 0.62         | 0.57        | 0.27 | 0.97 | <b>0.78</b> | 0.58   | <b>0.70</b> | 0.19 | 0.96 | 0.76        |
| CzechPD       | SS   | PD-20, HC-15 | 0.89         | <b>0.89</b> | 1.00 | 0.80 | <b>0.92</b> | 0.74   | 0.76        | 0.80 | 0.70 | 0.85        |
|               | RP   | PD-20, HC-15 | 0.77         | 0.77        | 0.93 | 0.65 | <b>0.90</b> | 0.80   | <b>0.82</b> | 0.80 | 0.80 | 0.87        |
| GITA          | SS   | PD-49, HC-50 | 0.72         | <b>0.70</b> | 0.84 | 0.59 | <b>0.73</b> | 0.67   | 0.65        | 0.72 | 0.61 | 0.69        |
|               | RP   | PD-49, HC-50 | 0.69         | 0.69        | 0.64 | 0.73 | <b>0.79</b> | 0.70   | <b>0.71</b> | 0.66 | 0.73 | 0.75        |
|               | TDU  | PD-50, HC-50 | 0.61         | 0.60        | 0.44 | 0.78 | 0.74        | 0.66   | <b>0.66</b> | 0.66 | 0.66 | <b>0.78</b> |
| ItalianPVS    | RP   | PD-24, HC-36 | 0.75         | <b>0.74</b> | 0.81 | 0.67 | 0.82        | 0.80   | 0.68        | 0.97 | 0.54 | <b>0.91</b> |
|               | TDU  | PD-22, HC-21 | 0.64         | <b>0.63</b> | 0.57 | 0.69 | <b>0.70</b> | 0.62   | 0.55        | 0.86 | 0.42 | <b>0.70</b> |
